# Supplementary material for: Raptor couples mTORC1 and ERK1/2 inhibition by cardamonin with oxidative stress induction in ovarian cancer cells
Source: PeerJ journal article supplement (doi:10.7717/peerj.15498), 2023-06-07
Supplement: FileS2ROS1.pdf [file FileS2ROS1.pdf]

# BD FACSDiva 8.0.3

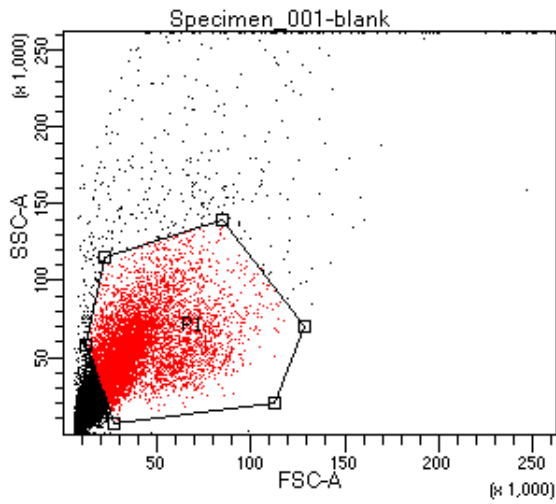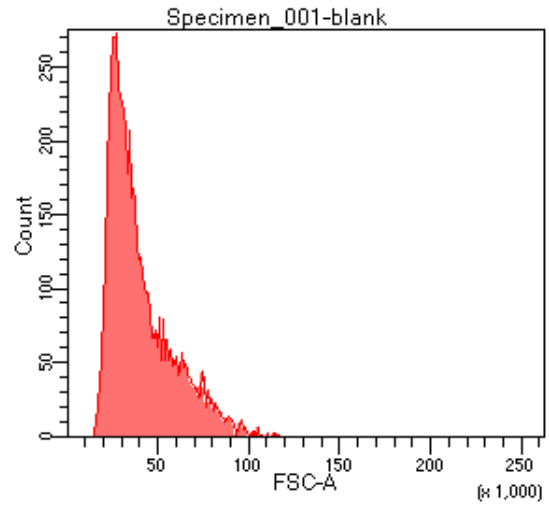

Experiment Name: 20200203 ROS A2780  
 Specimen Name: Specimen\_001  
 Tube Name: blank  
 Record Date: Feb 3, 2021 2:17:04 PM  
 SOP: Administrator  
 GUID: 8768084a-1a61-4e06-90ea-39...

| Population                            | #Events | %Parent | FSC-A<br>Mean |
|---------------------------------------|---------|---------|---------------|
| <span style="color: red;">■</span> P1 | 6,598   | 29.8    | 38,735        |

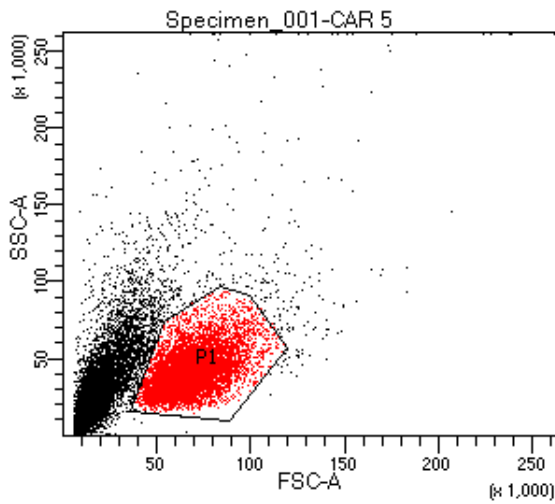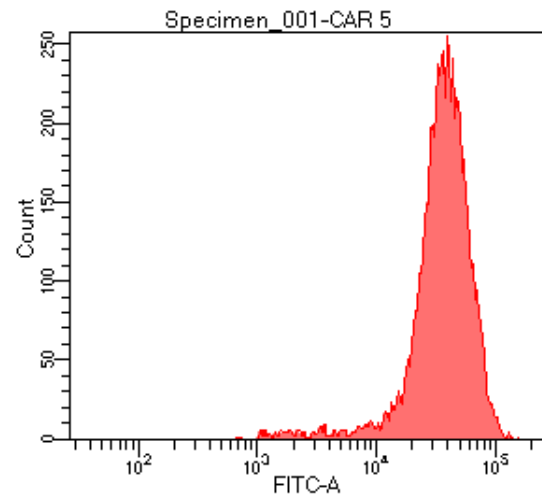

Experiment Name: 20200203 ROS A2780  
 Specimen Name: Specimen\_001  
 Tube Name: CAR 5  
 Record Date: Feb 3, 2021 2:25:05 PM  
 SOP: Administrator  
 GUID: 7ddc9ed8-7670-449e-8bb2-76b...

| Population                            | #Events | %Parent | FITC-A<br>Mean |
|---------------------------------------|---------|---------|----------------|
| <span style="color: red;">■</span> P1 | 7,350   | 40.1    | 38,016         |

# BD FACSDiva 8.0.3

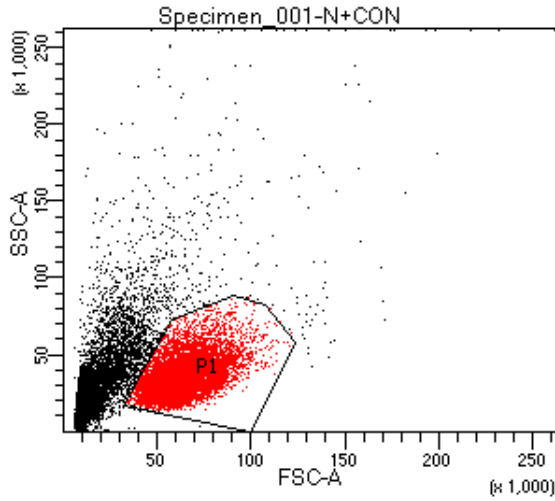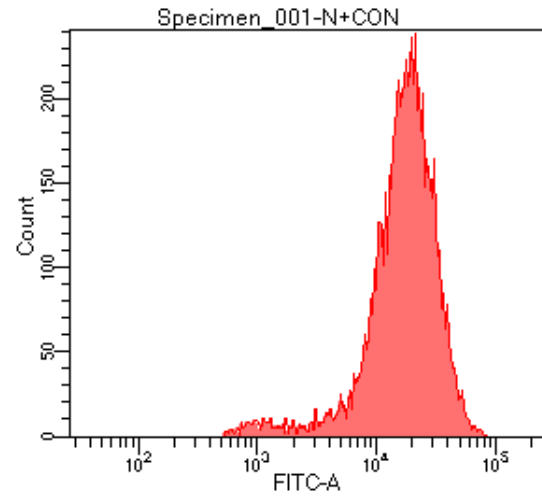

|                  |                                  |
|------------------|----------------------------------|
| Experiment Name: | 20200203 ROS A2780               |
| Specimen Name:   | Specimen_001                     |
| Tube Name:       | N+CON                            |
| Record Date:     | Feb 3, 2021 2:30:29 PM           |
| SOP:             | Administrator                    |
| GUID:            | 6e86711b-176f-4285-aef2-f9bfa... |

  

| Population | #Events | %Parent | FITC-A Mean |
|------------|---------|---------|-------------|
| ■ P1       | 8,012   | 47.2    | 18,752      |

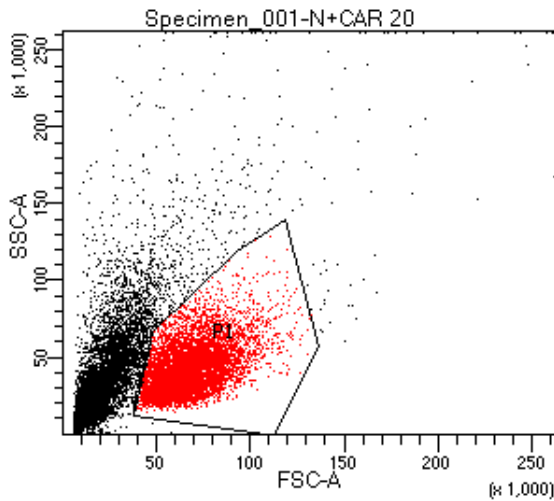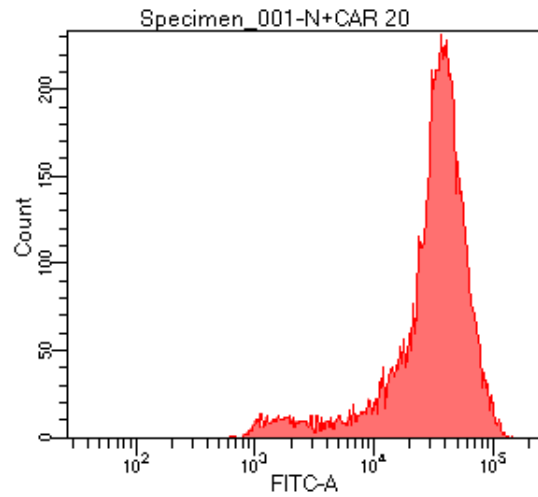

|                  |                                 |
|------------------|---------------------------------|
| Experiment Name: | 20200203 ROS A2780              |
| Specimen Name:   | Specimen_001                    |
| Tube Name:       | N+CAR 20                        |
| Record Date:     | Feb 3, 2021 2:32:36 PM          |
| SOP:             | Administrator                   |
| GUID:            | bed97aff-199a-4def-a685-6556... |

  

| Population | #Events | %Parent | FITC-A Mean |
|------------|---------|---------|-------------|
| ■ P1       | 7,139   | 37.9    | 34,804      |

# BD FACSDiva 8.0.3

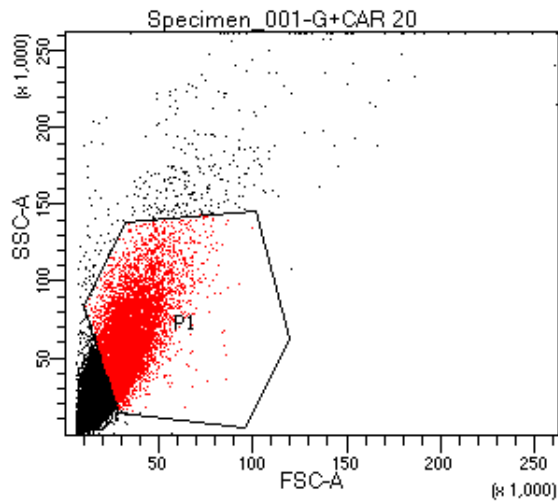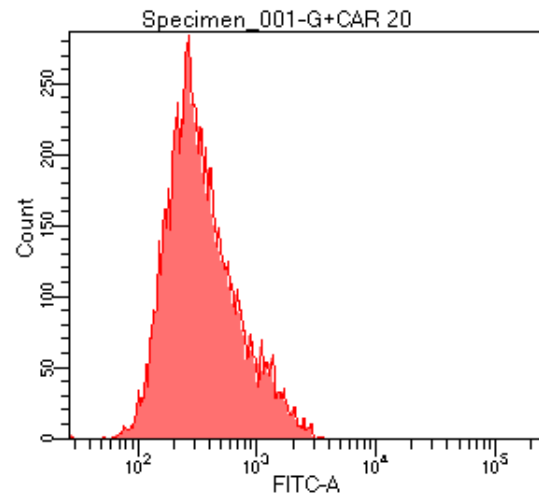

|                  |                                 |
|------------------|---------------------------------|
| Experiment Name: | 20200203 ROS A2780              |
| Specimen Name:   | Specimen_001                    |
| Tube Name:       | G+CAR 20                        |
| Record Date:     | Feb 3, 2021 2:37:22 PM          |
| SOP:             | Administrator                   |
| GUID:            | 4fe44348-7489-46fb-8c73-8e06... |

| Population                            | #Events | %Parent | FITC-A Mean |
|---------------------------------------|---------|---------|-------------|
| <span style="color: red;">■</span> P1 | 10,114  | 22.3    | 453         |

# BD FACSDiva 8.0.3

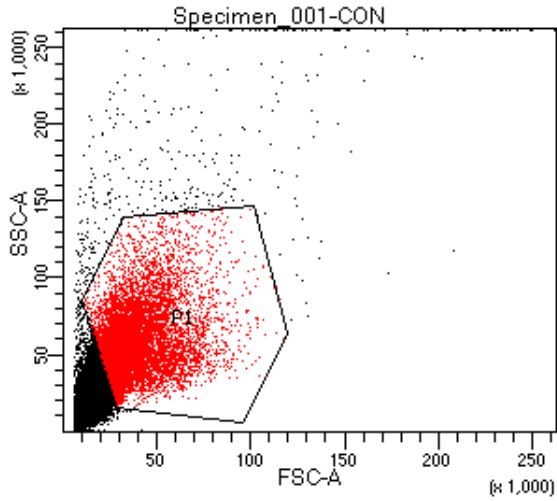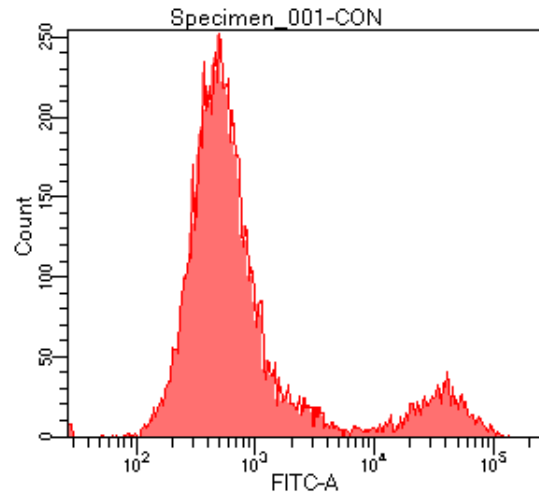

|                  |                                 |
|------------------|---------------------------------|
| Experiment Name: | 20200203 ROS A2780              |
| Specimen Name:   | Specimen_001                    |
| Tube Name:       | CON                             |
| Record Date:     | Feb 3, 2021 2:23:39 PM          |
| SOP:             | Administrator                   |
| GUID:            | 48c431cc-54c8-4a79-8bfa-48d4... |

| Population                            | #Events | %Parent | FITC-A Mean |
|---------------------------------------|---------|---------|-------------|
| <span style="color: red;">■</span> P1 | 10,000  | 23.1    | 5,010       |

# BD FACSDiva 8.0.3

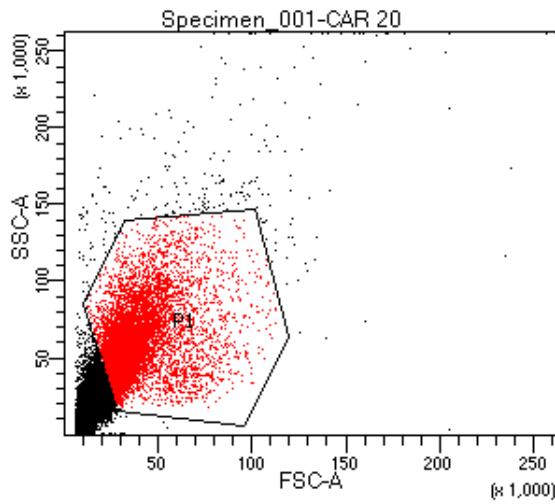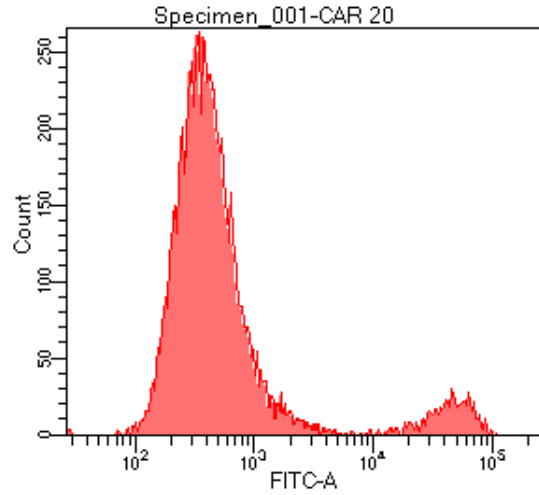

|                  |                                |
|------------------|--------------------------------|
| Experiment Name: | 20200203 ROS A2780             |
| Specimen Name:   | Specimen_001                   |
| Tube Name:       | CAR 20                         |
| Record Date:     | Feb 3, 2021 2:28:33 PM         |
| SOP:             | Administrator                  |
| GUID:            | 5a426e17-4af8-4aa2-8974-e80... |

  

| Population                            | #Events | %Parent | FITC-A<br>Mean |
|---------------------------------------|---------|---------|----------------|
| <span style="color: red;">■</span> P1 | 10,000  | 20.9    | 3,941          |

# BD FACSDiva 8.0.3

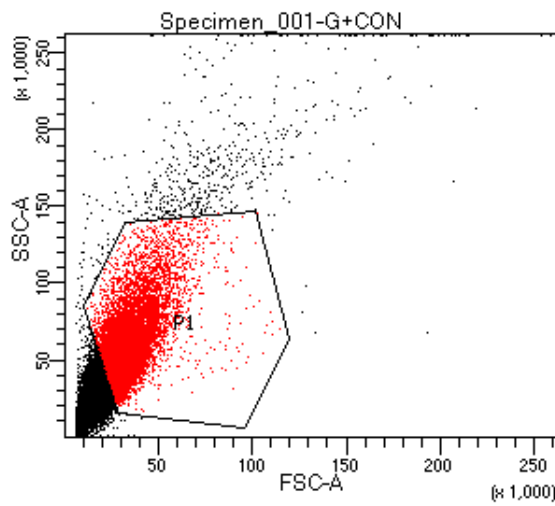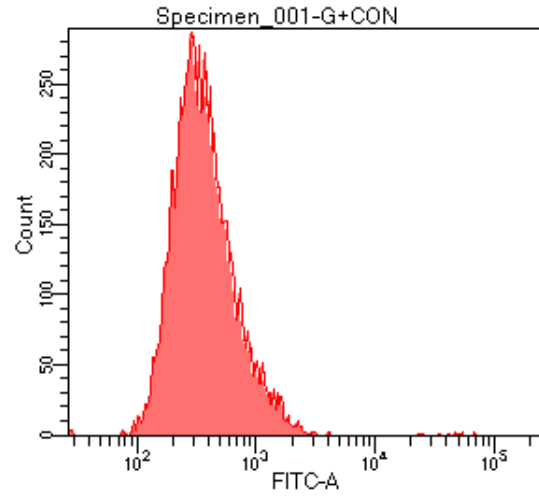

|                  |                                |
|------------------|--------------------------------|
| Experiment Name: | 20200203 ROS A2780             |
| Specimen Name:   | Specimen_001                   |
| Tube Name:       | G+CON                          |
| Record Date:     | Feb 3, 2021 2:35:25 PM         |
| SOP:             | Administrator                  |
| GUID:            | 7a2358dc-845b-41e3-8535-6fe... |

| Population                            | #Events | %Parent | FITC-A Mean |
|---------------------------------------|---------|---------|-------------|
| <span style="color: red;">■</span> P1 | 10,000  | 25.2    | 656         |
