# Supplementary material for: Raptor couples mTORC1 and ERK1/2 inhibition by cardamonin with oxidative stress induction in ovarian cancer cells
Source: PeerJ journal article supplement (doi:10.7717/peerj.15498), 2023-06-07
Supplement: FileS3ROS2.pdf [file FileS3ROS2.pdf]

# BD FACSDiva 8.0.3

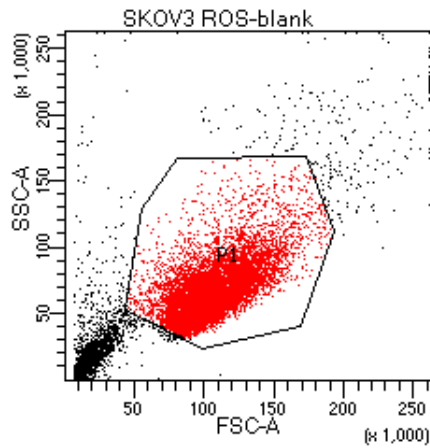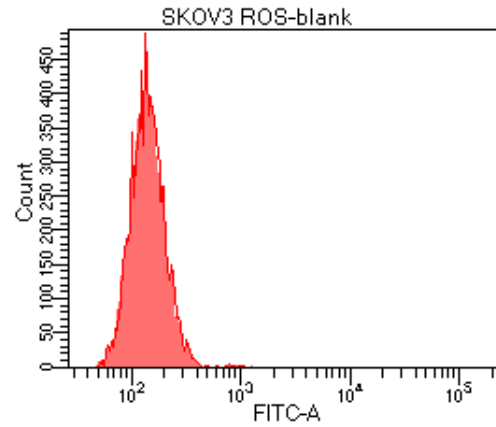

Experiment Name: 20210203 ROS  
 Specimen Name: SKOV3 ROS  
 Tube Name: blank  
 Record Date: Feb 3, 2021 1:52:53 PM  
 SOP: Administrator  
 GUID: a4fe4dc0-c53e-4f8d-8cdb-cefa0...

| Population | #Events | %Parent | FITC-A<br>Mean |
|------------|---------|---------|----------------|
| ■ P1       | 10,000  | 61.6    | 170            |

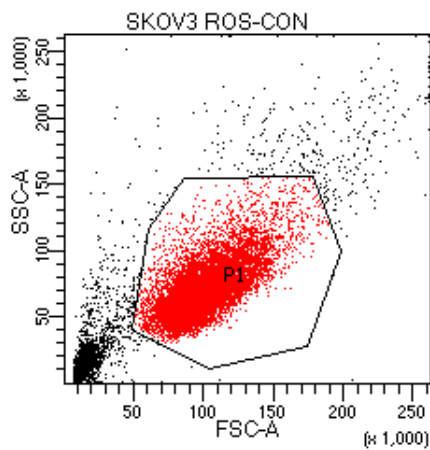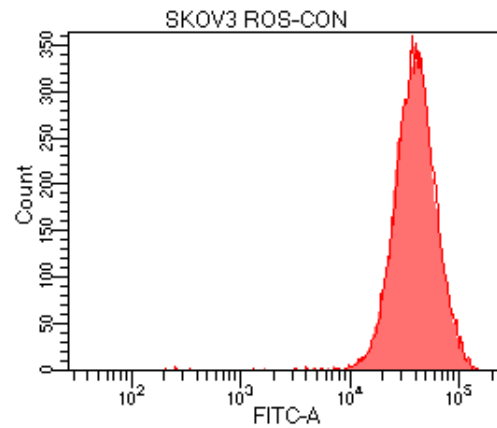

Experiment Name: 20210203 ROS  
 Specimen Name: SKOV3 ROS  
 Tube Name: CON  
 Record Date: Feb 3, 2021 1:54:26 PM  
 SOP: Administrator  
 GUID: b1673093-4725-4e14-9de6-e9...

| Population | #Events | %Parent | FITC-A<br>Mean |
|------------|---------|---------|----------------|
| ■ P1       | 10,000  | 67.8    | 41,085         |

# BD FACSDiva 8.0.3

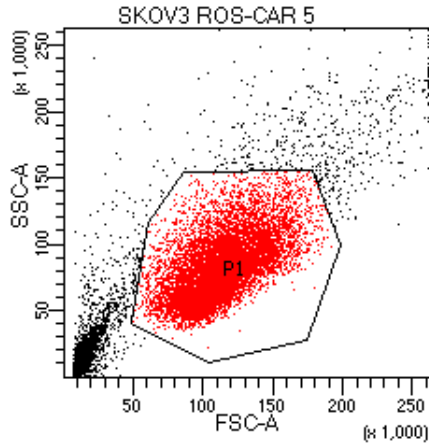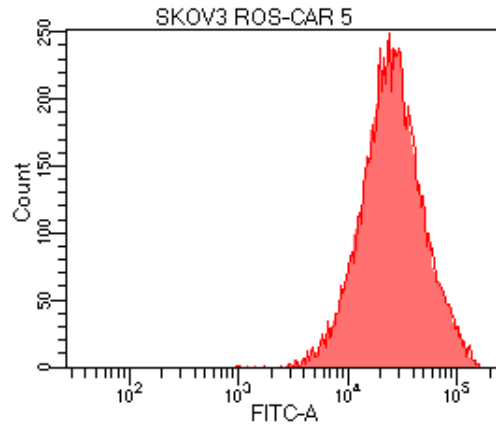

Experiment Name: 20210203 ROS  
 Specimen Name: SKOV3 ROS  
 Tube Name: CAR 5  
 Record Date: Feb 3, 2021 1:57:48 PM  
 SOP: Administrator  
 GUID: 03a7c985-8096-4f4c-8cca-1d47...

| Population                            | #Events | %Parent | FITC-A Mean |
|---------------------------------------|---------|---------|-------------|
| <span style="color: red;">■</span> P1 | 10,000  | 64.8    | 29,986      |

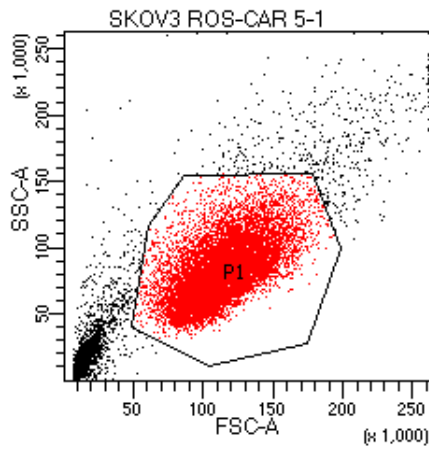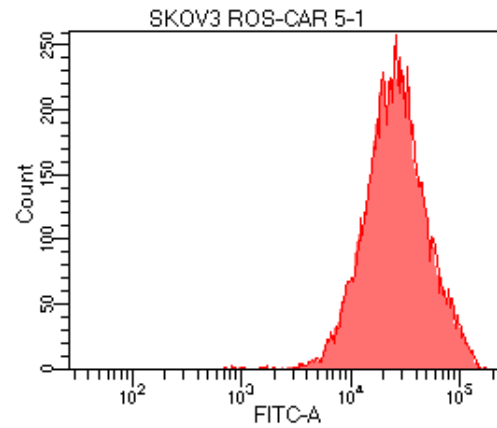

Experiment Name: 20210203 ROS  
 Specimen Name: SKOV3 ROS  
 Tube Name: CAR 5-1  
 Record Date: Feb 3, 2021 1:58:32 PM  
 SOP: Administrator  
 GUID: ab1ca5e6-b4f6-4e4b-9fb4-caaa...

| Population                            | #Events | %Parent | FITC-A Mean |
|---------------------------------------|---------|---------|-------------|
| <span style="color: red;">■</span> P1 | 10,000  | 64.7    | 30,340      |

# BD FACSDiva 8.0.3

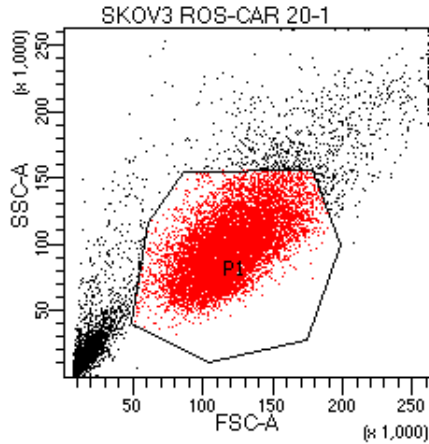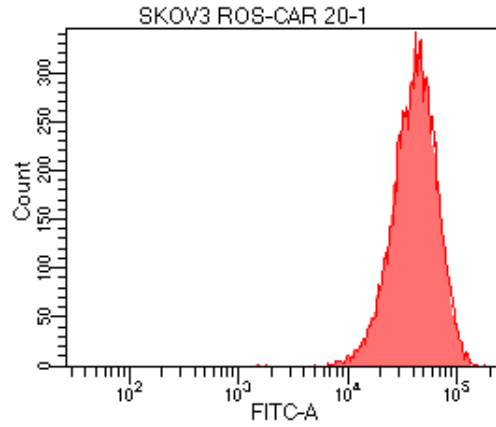

|                  |                                |
|------------------|--------------------------------|
| Experiment Name: | 20210203 ROS                   |
| Specimen Name:   | SKOV3 ROS                      |
| Tube Name:       | CAR 20-1                       |
| Record Date:     | Feb 3, 2021 2:01:02 PM         |
| SOP:             | Administrator                  |
| GUID:            | da6bbd61-d62a-49df-b6ea-dc6... |

  

| Population                            | #Events | %Parent | FITC-A Mean |
|---------------------------------------|---------|---------|-------------|
| <span style="color: red;">■</span> P1 | 10,000  | 58.3    | 42,968      |

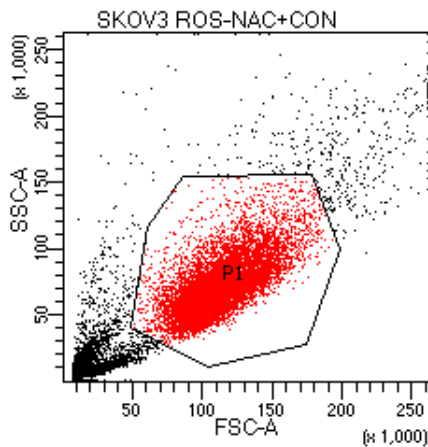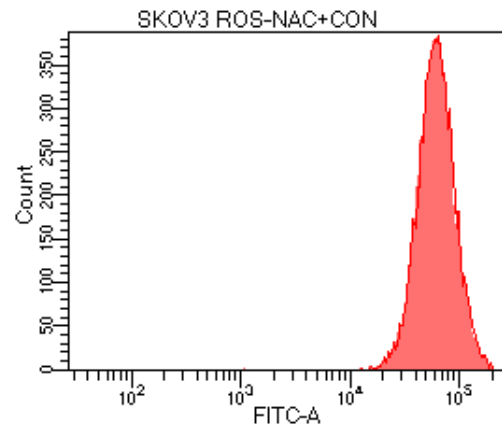

|                  |                                 |
|------------------|---------------------------------|
| Experiment Name: | 20210203 ROS                    |
| Specimen Name:   | SKOV3 ROS                       |
| Tube Name:       | NAC+CON                         |
| Record Date:     | Feb 3, 2021 2:03:05 PM          |
| SOP:             | Administrator                   |
| GUID:            | 246fdb10-5132-4d6b-a27b-7fd4... |

  

| Population                            | #Events | %Parent | FITC-A Mean |
|---------------------------------------|---------|---------|-------------|
| <span style="color: red;">■</span> P1 | 10,000  | 63.5    | 63,344      |

# BD FACSDiva 8.0.3

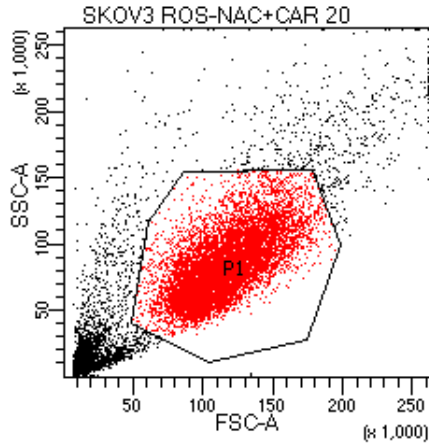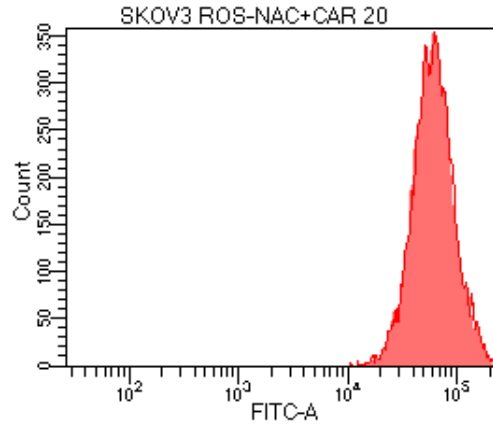

Experiment Name: 20210203 ROS  
Specimen Name: SKOV3 ROS  
Tube Name: NAC+CAR 20  
Record Date: Feb 3, 2021 2:05:37 PM  
SOP: Administrator  
GUID: eb5047fb-cdc2-4166-9bf5-50f7...

| Population                            | #Events | %Parent | FITC-A Mean |
|---------------------------------------|---------|---------|-------------|
| <span style="color: red;">■</span> P1 | 10,000  | 68.4    | 63,778      |

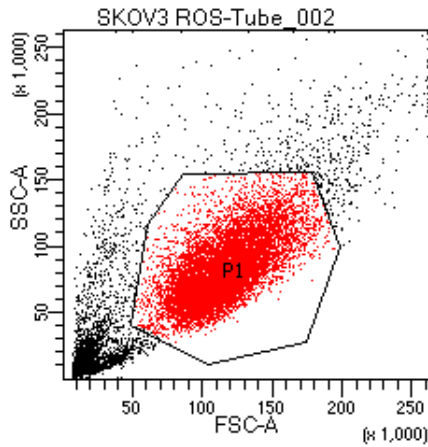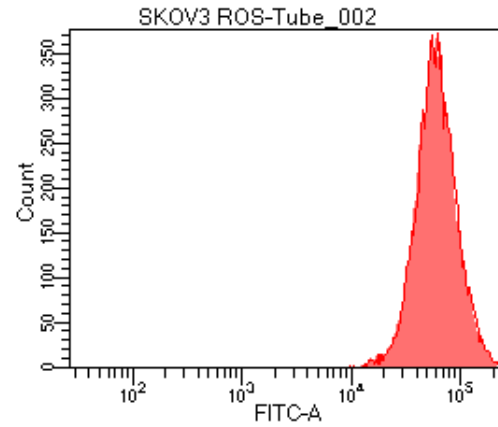

Experiment Name: 20210203 ROS  
Specimen Name: SKOV3 ROS  
Tube Name: Tube\_002  
Record Date: Feb 3, 2021 2:07:21 PM  
SOP: Administrator  
GUID: 2a43f83c-f5ef-44f6-9018-ace43...

| Population                            | #Events | %Parent | FITC-A Mean |
|---------------------------------------|---------|---------|-------------|
| <span style="color: red;">■</span> P1 | 10,000  | 67.5    | 62,944      |

# BD FACSDiva 8.0.3

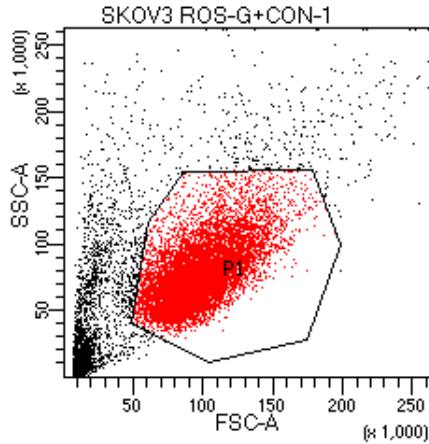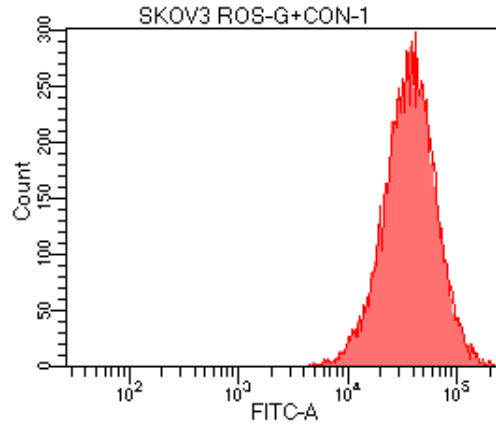

Experiment Name: 20210203 ROS  
 Specimen Name: SKOV3 ROS  
 Tube Name: G+CON-1  
 Record Date: Feb 3, 2021 2:09:34 PM  
 SOP: Administrator  
 GUID: ae244ba6-b484-4c6d-909b-17e...

| Population | #Events | %Parent | FITC-A<br>Mean |
|------------|---------|---------|----------------|
| ■ P1       | 10,000  | 71.2    | 41,122         |

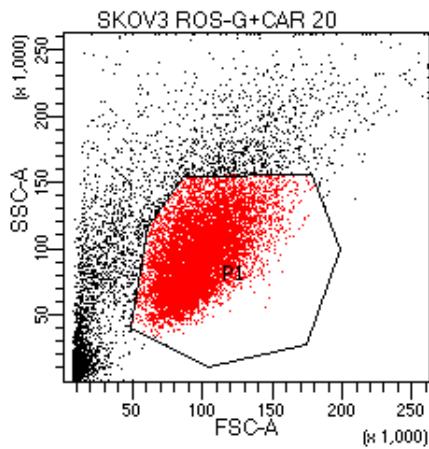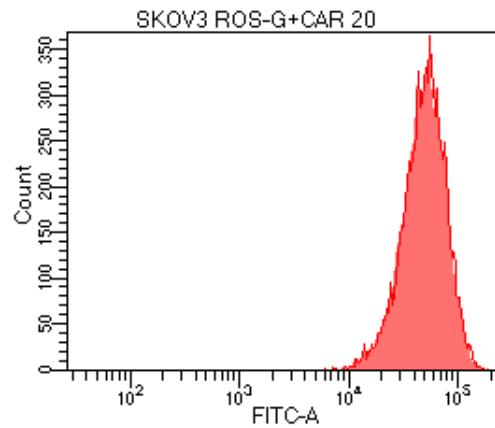

Experiment Name: 20210203 ROS  
 Specimen Name: SKOV3 ROS  
 Tube Name: G+CAR 20  
 Record Date: Feb 3, 2021 2:10:36 PM  
 SOP: Administrator  
 GUID: aeeb7624-105f-442a-a6bf-7cdf...

| Population | #Events | %Parent | FITC-A<br>Mean |
|------------|---------|---------|----------------|
| ■ P1       | 10,000  | 66.4    | 51,355         |

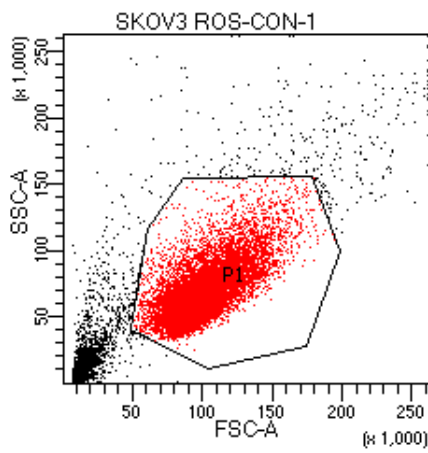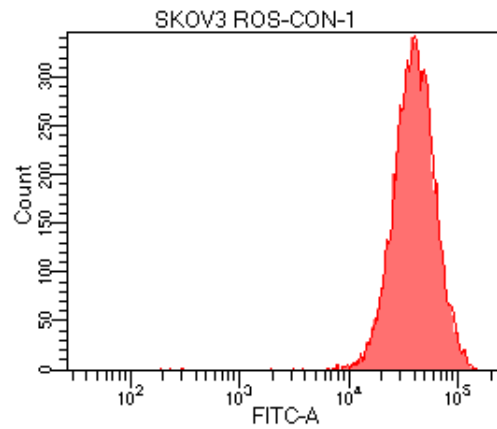

| Experiment Name:                      | 20210203 ROS                   |         |             |
|---------------------------------------|--------------------------------|---------|-------------|
| Specimen Name:                        | SKOV3 ROS                      |         |             |
| Tube Name:                            | CON-1                          |         |             |
| Record Date:                          | Feb 3, 2021 1:55:07 PM         |         |             |
| SOP:                                  | Administrator                  |         |             |
| GUID:                                 | 1f59dce8-5e90-4e18-a2e4-54c... |         |             |
| Population                            | #Events                        | %Parent | FITC-A Mean |
| <span style="color: red;">■</span> P1 | 10,000                         | 66.5    | 41,242      |

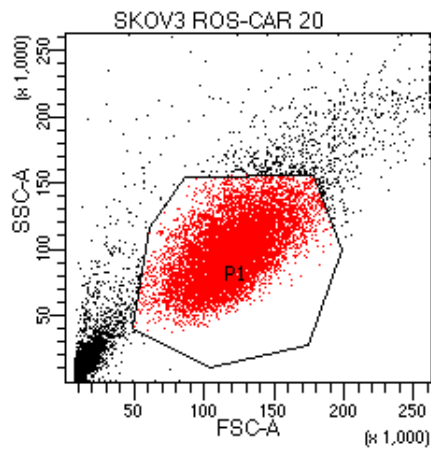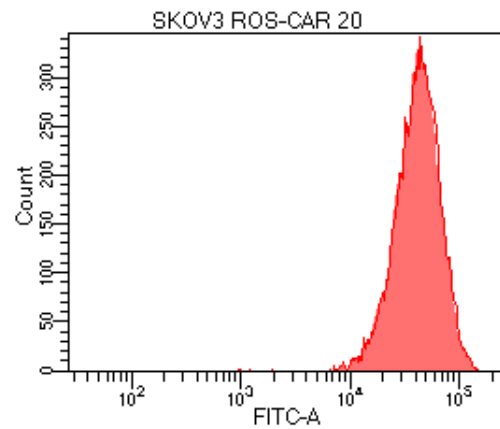

| Experiment Name:                      | 20210203 ROS                    |         |             |
|---------------------------------------|---------------------------------|---------|-------------|
| Specimen Name:                        | SKOV3 ROS                       |         |             |
| Tube Name:                            | CAR 20                          |         |             |
| Record Date:                          | Feb 3, 2021 2:00:16 PM          |         |             |
| SOP:                                  | Administrator                   |         |             |
| GUID:                                 | 623f43d7-223f-4e39-b563-65e5... |         |             |
| Population                            | #Events                         | %Parent | FITC-A Mean |
| <span style="color: red;">■</span> P1 | 10,000                          | 59.2    | 43,349      |

# BD FACSDiva 8.0.3

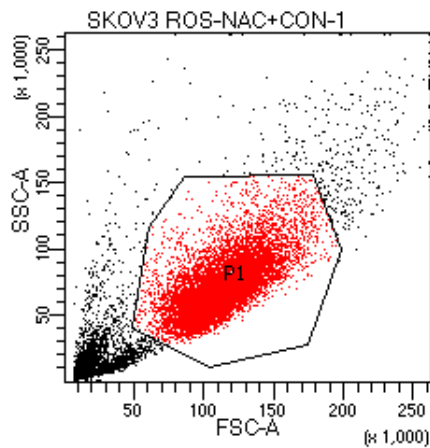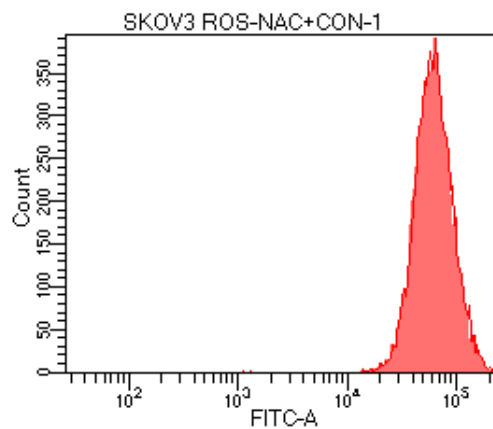

|                  |                                 |
|------------------|---------------------------------|
| Experiment Name: | 20210203 ROS                    |
| Specimen Name:   | SKOV3 ROS                       |
| Tube Name:       | NAC+CON-1                       |
| Record Date:     | Feb 3, 2021 2:03:51 PM          |
| SOP:             | Administrator                   |
| GUID:            | 786f1c78-81cc-47c3-b2d2-ec18... |

| Population                            | #Events | %Parent | FITC-A<br>Mean |
|---------------------------------------|---------|---------|----------------|
| <span style="color: red;">■</span> P1 | 10,000  | 63.6    | 63,803         |



BD FACSDiva 8.0.3

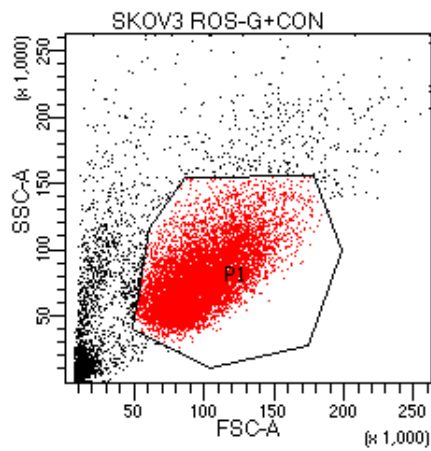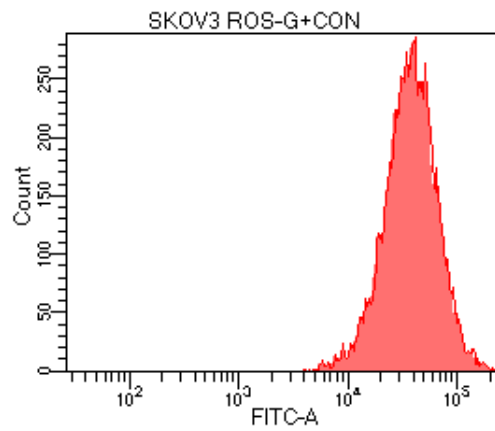

|                  |                                |         |             |
|------------------|--------------------------------|---------|-------------|
| Experiment Name: | 20210203 ROS                   |         |             |
| Specimen Name:   | SKOV3 ROS                      |         |             |
| Tube Name:       | G+CON                          |         |             |
| Record Date:     | Feb 3, 2021 2:08:51 PM         |         |             |
| SOP:             | Administrator                  |         |             |
| GUID:            | 43776e47-de10-41dd-8eb4-c01... |         |             |
| Population       | #Events                        | %Parent | FITC-A Mean |
| ■ P1             | 10,000                         | 73.4    | 41,770      |

# BD FACSDiva 8.0.3

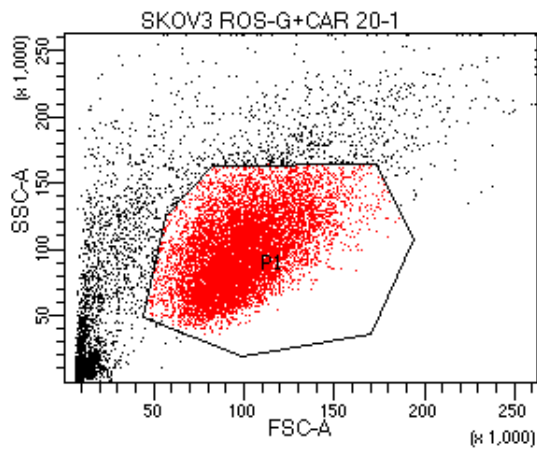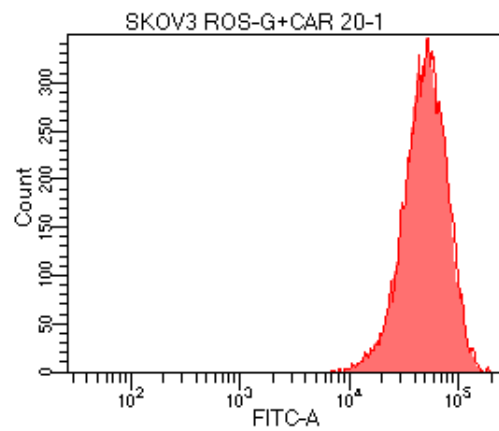

| Experiment Name:                      | 20210203 ROS                    |         |             |
|---------------------------------------|---------------------------------|---------|-------------|
| Specimen Name:                        | SKOV3 ROS                       |         |             |
| Tube Name:                            | G+CAR 20-1                      |         |             |
| Record Date:                          | Feb 3, 2021 2:11:25 PM          |         |             |
| SOP:                                  | Administrator                   |         |             |
| GUID:                                 | 6e9e97d5-b082-45fe-809d-ff21... |         |             |
| Population                            | #Events                         | %Parent | FITC-A Mean |
| <span style="color: red;">■</span> P1 | 10,324                          | 68.6    | 52,071      |
