# Supplementary material for: Raptor couples mTORC1 and ERK1/2 inhibition by cardamonin with oxidative stress induction in ovarian cancer cells
Source: PeerJ. 2023 Jun 7;11:e15498. doi: 10.7717/peerj.15498 (PMC10257395; doi:10.7717/peerj.15498)
Supplement: Supplemental Information 1 [file peerj-11-15498-s001.xls]

## Sheet: Sheet1
1 mM													无预处理
A2780	CON	CAR5	CAR20	N+CON	N+CAR5	N+CAR20	G+CON	G+CAR5	G+CAR20				SKOV3
	100	73.1781	57.8512	96.3561	73.8648	62.2089	39.1011	44.8159	30.4658					CON	CAR5	CAR20
	100	82.7036	74.974	87.3484	87.9038	66.9671	50.263	37.9203	26.0196					100	86.1169	79.886
	100	96.354	95.1139	105.91	99.2706	95.4996	63.8969	93.4678	87.1498					100	91.53	75.623
均值	100	84.0786	66.4126	96.538	93.5872	74.8919	57.0799	41.3681	28.2427					100	82.31	80.521
标准差	0	11.649	18.6517	9.28197	12.7263	18.0047	12.4184	30.2767	34.0826				平均值	100	88.8234	78.072
													标准差	0	4.63326	2.66354
													细胞活力	100	88.8234	78.072
SKOV3	CON	CAR5	CAR20	N+CON	N+CAR5	N+CAR20	G+CON	G+CAR5	G+CAR20
	100	94.535	87.1981	96.3567	86.7696	78.0044	36.0254	67.814	65.8514
	100	86.1632	77.8115	92.3006	92.4517	85.9903	69.5048	32.0838	25.1194				A2780
	100	94.1754	91.6842	97.8246	97.2632	94.4211	66.5789	60.0702	57.1579					CON	CAR5	CAR20
均值	100	91.6245	82.5048	95.494	94.8574	90.2057	68.0419	53.3227	41.1387					100	86.832	59.198
标准差	0	4.7331	7.07916	2.86124	5.25281	8.20933	18.5426	18.7965	21.452					100	89.213	69.125
														100	84.535	63.998
													平均值	100	86.86	64.1615
													标准差	0	2.33913	4.9644
													细胞活力	100	86.86	64.1615
