# Supplementary material for: Raptor couples mTORC1 and ERK1/2 inhibition by cardamonin with oxidative stress induction in ovarian cancer cells
Source: PeerJ. 2023 Jun 7;11:e15498. doi: 10.7717/peerj.15498 (PMC10257395; doi:10.7717/peerj.15498)
Supplement: Supplemental Information 8 [file peerj-11-15498-s008.xls]

## Sheet: Sheet1
fig.1C	Area	mean	min	max	wound closure
0h 1	995399	237.84	0	255
2	950274	226.927	0	255	0.0453336
3	936166	217.818	0	255	0.0595068
24h 4	4822	12.467	0	42	0.995156
5	175759	204.875	0	255	0.815044
6	631719	214.398	0	255	0.325206
0h 1	803699	236.56	0	255
2	809740	225.17	0	255	-0.0075165
3	803208	209.48	0	255	0.000610925
24h 4	5849	13.76	0	48	0.992722
5	136995	201.899	0	255	0.830816
6	542086	211.097	0	255	0.325099
0h 1	937927	221.897	0	255
2	880730	213.875	0	255	0.0609824
3	890376	208.864	0	255	0.050698
24h 4	4089	11.347	0	39	0.99564
5	158649	207.985	0	255	0.819866
6	608979	216.908	0	255	0.316043
	0.0453	0.0595	0.995156	0.815	0.3252
	-0.0075	0.0006	0.993867	0.8308	0.3251
	0.0609824	0.0507	0.99564	0.8199	0.316
mean	0.0329275	0.0369333	0.994888	0.8219	0.3221
SD	0.0358785	0.0317717	0.000916547	0.00808764	0.00528299
fig.1D	Area	mean	min	max	wound closure
0h 1	998903	253	0	255
2	863594	235.353	0	255	0.135458
3	856340	253.546	0	255	0.14272
24h 4	934964	223.953	0	42	0.0640092
5	821349	234.564	0	255	0.0489177
6	803464	237.953	0	255	0.0617465
0h 1	992340	236.56	0	255
2	893344	234.59	0	255	0.0997602
3	830532	230.563	0	255	0.163057
24h 4	924213	212.453	0	48	0.0686529
5	832354	206.345	0	255	0.0682716
6	812305	224.533	0	255	0.0219462
0h 1	982340	221.897	0	255
2	830532	213.875	0	255	0.154537
3	843426	208.864	0	255	0.141411
24h 4	910354	11.347	0	39	0.0732801
5	831349	207.985	0	255	-0.000983707
6	824643	216.908	0	255	0.0222699
	0.135458	0.14272	0.0640092	0.0489177	0.0617465
	0.0997602	0.163057	0.0686529	0.0682716	0.0219462
	0.154537	0.141411	0.0732801	-0.000983707	0.0222699
mean	0.129918	0.149063	0.0686474	0.0387352	0.0353209
SD	0.0278054	0.0121371	0.00463546	0.0357328	0.0228859
fig.3C	Area	mean	min	max	wound closure
0h 1	983532	234.88	0	255
2	972341	235.32	0	255	0.0113784
3	923523	232.32	0	255	0.0610138
4	953424	253.7	0	255	0.0306121
5	973462	243.32	0	255	0.0102386
6	963443	241.5	0	255	0.0204254
7	957453	221.745	0	255	0.0265157
24h 1	3966	13.54	0	31	0.995968
2	115759	156.6	0	255	0.882303
3	431719	167.98	0	255	0.561052
4	293535	156.853	0	255	0.70155
5	2832	9.064	0	30	0.997121
6	3064	11.453	0	30	0.996885
7	172435	178.97	0	255	0.824678
0h 1	963532	241.56	0	255
2	972331	231.77	0	255	-0.00913203
3	923523	256.97	0	255	0.0415233
4	894224	251.77	0	255	0.0719312
5	963461	221.78	0	255	7.36872e-05
6	953443	237.65	0	255	0.0104709
7	934453	251.7	0	255	0.0301796
24h 1	4023	13.89	0	30	0.995825
2	122432	178.967	0	255	0.874084
3	353235	187.78	0	255	0.617514
4	390564	197.97	0	255	0.563237
5	2353	8.795	0	28	0.997558
6	3623	9.975	0	29	0.9962
7	154523	156.889	0	255	0.834638
0h 1	952344	261.34	0	255
2	942345	239.45	0	255	0.0219889
3	932352	245.6	0	255	0.0323601
4	914335	225.79	0	255	0.051059
5	942356	215.79	0	255	0.0219775
6	963255	242.65	0	255	0.000287484
7	942356	251.68	0	255	0.0219775
24h 1	3823	13.056	0	33	0.996032
2	105432	175.68	0	255	0.888117
3	398641	185.08	0	255	0.572435
4	306321	201.567	0	255	0.664979
5	2508	9.996	0	32	0.997339
6	3325	11.05	0	33	0.996548
7	138961	135.678	0	255	0.852539
	0.0113784	0.0610138	0.0306121	0.0102386	0.0204254	0.0265157	0.995968	0.882303	0.561052	0.70155	0.997121	0.996885	0.824678
	-0.00913203	0.0415233	0.0719312	7.36872e-05	0.0104709	0.0301796	0.995825	0.874084	0.617514	0.563237	0.997558	0.9962	0.834638
	0.0219889	0.0323601	0.051059	0.0219775	0.000287484	0.0219775	0.996	0.888117	0.572435	0.664979	0.997339	0.996548	0.852539
mean	0.00807841	0.0449657	0.0512008	0.0107633	0.0103946	0.0262242	0.995931	0.881501	0.583667	0.643256	0.997339	0.996544	0.837285
SD	0.0158207	0.0146337	0.0206599	0.0109613	0.0100692	0.00410882	9.32522e-05	0.00705093	0.0298594	0.0716699	0.000218591	0.000342321	0.0141178
fig.3D	Area	mean	min	max	wound closure
0h 1	893952	213.65	0	255
2	873945	205.23	0	255	0.0223804
3	899346	203.34	0	255	-0.00603388
4	832625	219.35	0	255	0.0686021
5	902424	221.023	0	255	-0.00947702
6	862424	224.14	0	255	0.0352681
7	843264	216.76	0	255	0.056701
24h 1	852234	201.35	0	31	0.0466669
2	862494	204.52	0	255	0.0131027
3	893246	212.307	0	255	0.00678271
4	822344	208.93	0	255	0.0123477
5	843244	210.35	0	30	0.0655789
6	853454	212.354	0	30	0.0104009
7	818244	197.89	0	255	0.0296704
0h 1	902342	224.84	0	255
2	892332	231.927	0	255	0.0738948
3	862323	227.358	0	255	0.10504
4	812433	225.563	0	255	0.156818
5	883452	221.64	0	255	0.0831109
6	892353	216.636	0	255	0.073873
7	872353	238.754	0	255	0.09463
24h 1	852343	214.56	0	30	0.0554103
2	873452	223.875	0	255	0.021158
3	873432	236.008	0	255	-0.0128826
4	802359	218.936	0	255	0.0123998
5	804523	210.35	0	28	0.0893416
6	853462	212.353	0	29	0.0435825
7	846734	235.89	0	255	0.0293677
0h 1	883446	213.82	0	255
2	893523	216.935	0	255	0.0726587
3	873424	207.118	0	255	0.0935184
4	893423	213.634	0	255	0.0727625
5	812453	215.456	0	255	0.156797
6	843462	221.556	0	255	0.124614
7	823534	231.235	0	255	0.145297
24h 1	853402	222.467	0	33	0.0340077
2	842353	204.124	0	255	0.0572677
3	832525	209.378	0	255	0.0468261
4	850853	207.93	0	255	0.0476482
5	745230	210.35	0	32	0.0827408
6	839632	212.768	0	33	0.00454081
7	813420	197.891	0	255	0.0122812
	0.0113784	0.0610138	0.0306121	0.0102386	0.0204254	0.0265157	0.0466669	0.0131027	0.00678271	0.0123	0.0656	0.0104009	0.0297
	-0.00913203	0.0415233	0.0719312	7.36872e-05	0.0104709	0.0301796	0.0554103	0.021158	-0.0128826	0.0124	0.0893416	0.0435825	0.0293677
	0.0219889	0.0323601	0.051059	0.0219775	0.000287484	0.0219775	0.0340077	0.0572677	0.0468261	0.0476	0.0827408	0.00454081	0.0122812
mean	0.00807841	0.0449657	0.0512008	0.0107633	0.0103946	0.0262242	0.0453616	0.0305095	0.0135754	0.0241	0.0792275	0.0195081	0.023783
SD	0.0158207	0.0146337	0.0206599	0.0109613	0.0100692	0.00410882	0.0107608	0.0235207	0.0304284	0.0203517	0.0122545	0.021054	0.0099622
fig.6C	Area	mean	min	max	wound closure
0h 1	863689	213.55	0	255
	968847	287.729	0	255
24h 1	20798	39.935	0	40	0.97592
	452709	167.878	0	255	0.532734
0h 1	785969	235.97	0	255
	808649	289.729	0	255
24h 1	24269	43.46	0	38	0.969122
	398685	169.86	0	255	0.506974
0h 1	836864	233.635	0	255
	875736	327.709	0	255
24h 1	17975	37.77	0	38	0.978521
	425808	177.348	0	255	0.513771
	0.97592	0.532734
	0.969122	0.506974
	0.978521	0.513771
mean	0.974521	0.517827
SD	0.004853	0.0133504
fig.7D	Area	mean	min	max	wound closure
0h 1	854952	223.672	0	255
2	842845	222.211	0	255	0.014161
3	839896	225.314	0	255	0.0176103
4	822525	239.335	0	255	0.0379284
5	832433	219.043	0	255	0.0263395
6	822423	244.104	0	255	0.0380478
24h 1	55963	115.305	0	43	0.934543
2	662494	194.502	0	255	0.213979
3	283246	172.217	0	255	0.662761
4	412334	181.093	0	255	0.498697
5	443249	199.305	0	41	0.467526
6	353454	132.04	0	40	0.570228
0h 1	833452	223.615	0	255
2	812835	205.223	0	255	0.0247369
3	823891	233.324	0	255	0.0114716
4	802522	208.335	0	255	0.0371107
5	832333	228.923	0	255	0.00134261
6	802414	223.914	0	255	0.0372403
24h 1	52363	134.335	0	33	0.937173
2	625493	164.521	0	255	0.23048
3	245324	134.337	0	255	0.702237
4	392321	146.923	0	255	0.51114
5	426649	156.325	0	42	0.487406
6	333113	132.304	0	35	0.584861
0h 1	863345	245.65	0	255
2	852865	223.23	0	255	0.0121388
3	853371	253.334	0	255	0.0115527
4	845022	242.351	0	255	0.0212233
5	842363	237.23	0	255	0.0243031
6	802414	234.141	0	255	0.0705755
24h 1	45363	123.35	0	444	0.947457
2	595383	147.52	0	255	0.301902
3	195324	112.334	0	255	0.771115
4	352343	157.923	0	255	0.583037
5	435639	169.335	0	43	0.482837
6	383234	158.334	0	38	0.522399
	0.934543	0.213979	0.662761	0.498697	0.467526	0.570228
	0.937173	0.23048	0.702237	0.51114	0.487406	0.584861
	0.947457	0.301902	0.771115	0.583037	0.482837	0.522399
mean	0.939724	0.248787	0.712038	0.530958	0.479256	0.559163
SD	0.00682452	0.0467333	0.0548379	0.0455287	0.0104125	0.0326686
